# Supplementary material for: Heat waves in Africa 1981–2015, observations and reanalysis
Source: Copernicus journal article supplement (doi:10.5194/nhess-2016-90), 2016-04-18
Supplement: Supplementary file 1 [file nhess-2016-90-supplement.pdf]

Annex:

ERA interim analysis HWMItn
